# Supplementary material
Source: PubMed Central journal article supplement (PMC2958091)
Supplement: NIHMS236200-supplement-Supp.pdf [file NIHMS236200-supplement-Supp.pdf]

## SUPPLEMENTARY MATERIAL

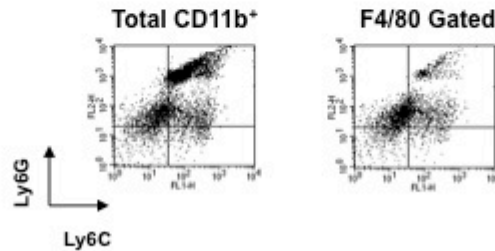

**Supplementary Figure 1** LPS administration induces CD11b<sup>+</sup>Ly6G<sup>+</sup>Ly6C<sup>-</sup>F4/80<sup>+</sup> and CD11b<sup>+</sup>Ly6G<sup>+</sup>Ly6C<sup>+</sup>F4/80<sup>+</sup> subsets of cells. Cells from the lungs of LPS-treated mice were purified based upon CD11b expression by magnetic bead selection, were stained with Ly6C, Ly6G and F4/80, and were analyzed by flow cytometry. The forward versus side light scatter pattern revealed a distinct non-lymphocytic population of cells where CD11b- and Gr1-expressing cells were concentrated. This population of cells was gated upon for subsequent analyses. The left panel shows the expression profile of Ly6G and Ly6C expression on CD11b<sup>+</sup> cells. The right panel depicts the expression profile of Ly6G and Ly6C expression on CD11b<sup>+</sup> cells gated on F4/80 expression. F4/80 expression was largely confined to CD11b<sup>+</sup>Ly6G<sup>int</sup> cells. Among the CD11b<sup>+</sup> cells gated on F4/80 expression, Ly6G<sup>int</sup>Ly6C<sup>-</sup> was the dominant population expanded by LPS treatment with the Ly6G<sup>int</sup>Ly6C<sup>lo</sup> population being the minor subset.

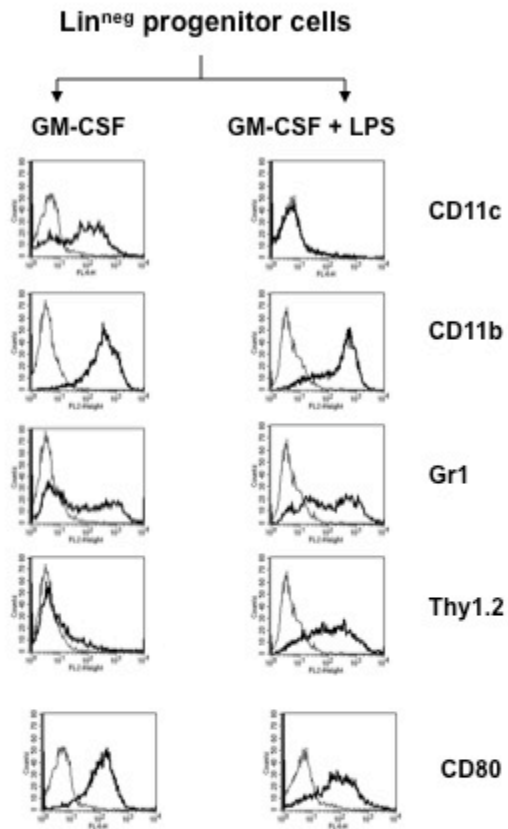

**Supplementary Figure 2** LPS treatment generates CD11b<sup>+</sup>Gr1<sup>int</sup> cells from lin<sup>neg</sup> progenitor cells. The lin<sup>neg</sup> population of bone marrow progenitor cells was enriched using a lineage depletion kit and phenotypic analysis was performed by flow cytometry. The lin<sup>neg</sup> population of bone marrow progenitor cells was cultured with GM-CSF (10 ng/ml) in the absence or presence of LPS (1μg/ml) for 9 days and phenotypic analysis was performed. These results are representative of at least 3 independent experiments.

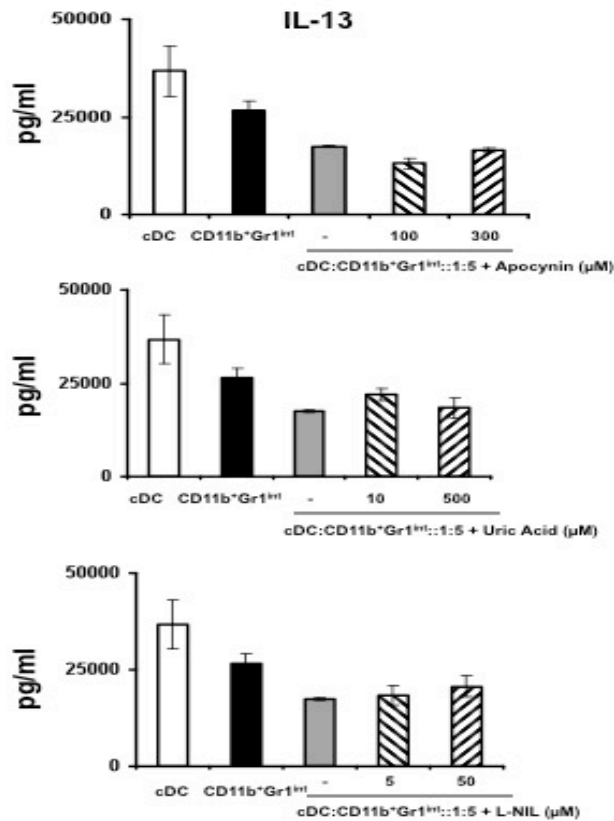

**Supplementary Figure 3** Suppression of Th2 cell response by CD11b<sup>+</sup>Gr1<sup>int</sup> cells induced by LPS administration does not involve nitric oxide. Th2 cells were generated *in vitro* using CD4<sup>+</sup> T cells from DO11.10 mice by incubation under Th2-skewing conditions for 6 days. cDCs and CD11b<sup>+</sup>Gr1<sup>int</sup> cells were isolated from the lungs of LPS-treated mice. cDCs and CD11b<sup>+</sup>Gr1<sup>int</sup> cells alone (each at 1 X 10<sup>5</sup> cells/well) or in combination as shown were cultured with Th2 polarized DO11.10 CD4<sup>+</sup> T cells (1 X 10<sup>6</sup> cells/well), OVA peptide (5 μg/ml) and various inhibitors at indicated concentrations. Culture supernatants were collected 36 hrs later and analyzed by multiplex cytokine assay for IL-13 levels.

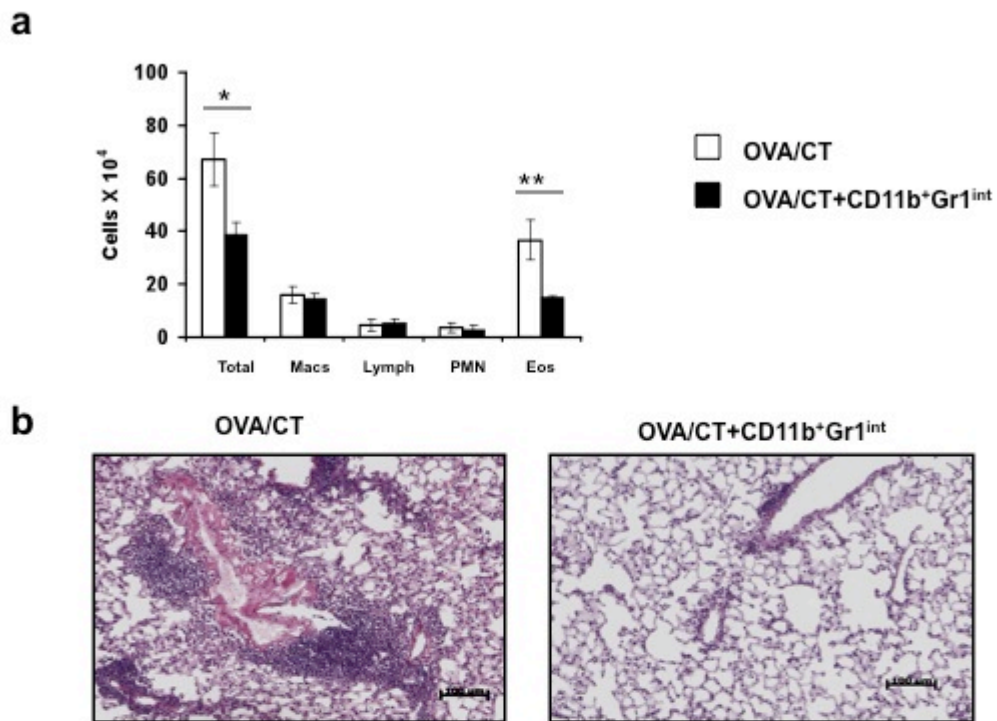

**Supplementary Figure 4** Suppression of eosinophilic airway inflammation by CD11b<sup>+</sup>Gr1<sup>int</sup> cells isolated from LPS-treated lungs. Mice were antigen-sensitized by three daily consecutive intranasal treatments with OVA plus cholera toxin (CT) followed by 5 d of rest. CD11b<sup>+</sup>Gr1<sup>int</sup> cells isolated from the lungs of LPS-treated mice were then adoptively transferred intratracheally ( $1 \times 10^6$  cells/mouse) into mice that had received OVA/CT. Control mice did not receive any cells. Mice were then challenged with aerosolized OVA daily for 7 d. Total and differential cell counts in the BAL fluid.
